# Supplementary figures and images for: Bioactive Coating With Low Reactive Sources for Application as Multi-nutrient Fertilizer Granules
Source: Research Square preprint supplement (doi:10.21203/rs.3.rs-529344/v1), 2021-06-01

**Graphical Abstract**

**
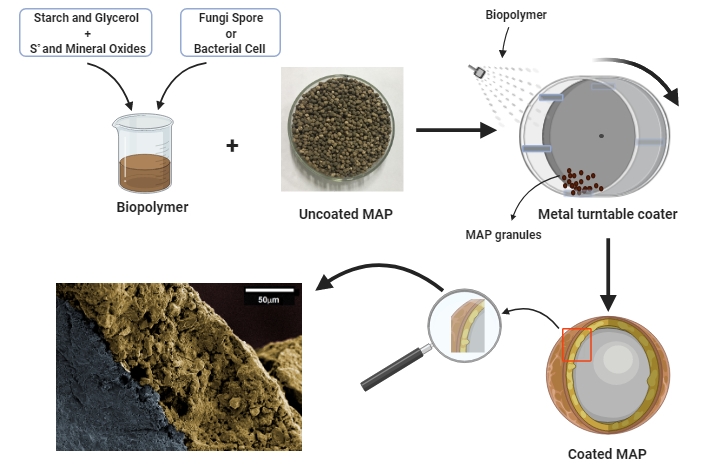
**

Supplement: Supplementary file 1 [file 9958373fe8a9bf27314da825.docx]
